# Supplementary material for: Temporal and Spatial Changes in Bromine Incorporation into Drinking Water–Disinfection By-Products in Pennsylvania
Source: Atypon-hosted journal article supplement (doi:10.1061/(asce)ee.1943-7870.0001499), 2018-12-31
Supplement: supplemental_data_ee.1943-7870.0001499_cadwallader.pdf [file supplemental_data_ee.1943-7870.0001499_cadwallader.pdf]

## SUPPLEMENTAL DATA

*ASCE Journal of Environmental Engineering*

# Temporal and Spatial Changes in Bromine Incorporation into Drinking Water–Disinfection Byproducts in Pennsylvania

Adam Cadwallader and Jeanne M. VanBriesen

**DOI:** 10.1061/(ASCE)EE.1943-7870.0001499

© ASCE 2018

[www.ascelibrary.org](http://www.ascelibrary.org)

**Table S1.** Raw data by region and sampling period (ICR, SP 1, SP 2)

| Sampling Period | Region    | Chloroform | BDCM | DBCM | Bromoform | TTHM |
|-----------------|-----------|------------|------|------|-----------|------|
| ICR             | Southeast | 6          | 5.9  | 3.5  | 0         | 15.4 |
| ICR             | Southeast | 8.5        | 8.5  | 8    | 1.2       | 26.2 |
| ICR             | Southeast | 22         | 5.2  | 0    | 0         | 27.2 |
| ICR             | Southeast | 8.2        | 8.1  | 8    | 3         | 27.3 |
| ICR             | Southeast | 21         | 5.8  | 1.1  | 0         | 27.9 |
| ICR             | Southeast | 12         | 10   | 5.9  | 0         | 27.9 |
| ICR             | Southeast | 21         | 8.1  | 0    | 0         | 29.1 |
| ICR             | Southeast | 25         | 6.5  | 0    | 0         | 31.5 |
| ICR             | Southeast | 27         | 5.9  | 0    | 0         | 32.9 |
| ICR             | Southeast | 22         | 9.9  | 2    | 0         | 33.9 |
| ICR             | Southeast | 24         | 8.4  | 1.8  | 0         | 34.2 |
| ICR             | Southeast | 27         | 7.5  | 1.3  | 0         | 35.8 |
| ICR             | Southeast | 18         | 10   | 6.8  | 1.3       | 36.1 |
| ICR             | Southeast | 25         | 11   | 2    | 0         | 38   |
| ICR             | Southeast | 30         | 7.9  | 1.1  | 0         | 39   |
| ICR             | Southeast | 38         | 8.2  | 0    | 0         | 46.2 |
| ICR             | Southeast | 55         | 11   | 0    | 0         | 66   |
| ICR             | Southeast | 55         | 13   | 2.9  | 0         | 70.9 |
| ICR             | Southeast | 52         | 16   | 3.9  | 0         | 71.9 |
| ICR             | Southeast | 56         | 16   | 3.7  | 0         | 75.7 |
| ICR             | Southeast | 61         | 14   | 1.6  | 0         | 76.6 |
| ICR             | Southwest | 15         | 4.1  | 0    | 0         | 19.1 |
| ICR             | Southwest | 21         | 4.6  | 0    | 0         | 25.6 |
| ICR             | Southwest | 10         | 8.2  | 5.4  | 2.3       | 25.9 |
| ICR             | Southwest | 29         | 5.8  | 0    | 0         | 34.8 |
| ICR             | Southwest | 30         | 5.5  | 0    | 0         | 35.5 |
| ICR             | Southwest | 25.6       | 8.4  | 2.6  | 0         | 36.6 |
| ICR             | Southwest | 26.1       | 9.2  | 2.3  | 0         | 37.6 |
| ICR             | Southwest | 38         | 4.5  | 0    | 0         | 42.5 |
| ICR             | Southwest | 22         | 14   | 7.2  | 0         | 43.2 |
| ICR             | Southwest | 28         | 14   | 5.9  | 0         | 47.9 |
| ICR             | Southwest | 29         | 14   | 6.3  | 0         | 49.3 |
| ICR             | Southwest | 37.3       | 12   | 2.9  | 0         | 52.2 |
| ICR             | Southwest | 32.8       | 15.4 | 9    | 0         | 57.2 |
| ICR             | Southwest | 47.6       | 11.5 | 2.5  | 0         | 61.6 |
| ICR             | Southwest | 20.7       | 18.5 | 18.2 | 6.8       | 64.2 |
| ICR             | Southwest | 38         | 21   | 8.5  | 1.2       | 68.7 |
| ICR             | Southwest | 21         | 24   | 19   | 8         | 72   |

|            |                  |             |            |             |             |       |
|------------|------------------|-------------|------------|-------------|-------------|-------|
| ICR        | Southwest        | 18          | 26         | 23          | 8.9         | 75.9  |
| ICR        | Southwest        | 57          | 20         | 5.4         | 0           | 82.4  |
| ICR        | Southwest        | 42.9        | 25.6       | 12.6        | 1.4         | 82.5  |
| ICR        | Southwest        | 35.1        | 29.3       | 17.2        | 2.9         | 84.5  |
| ICR        | Southwest        | 68.5        | 0          | 8.8         | 9.2         | 86.5  |
| ICR        | Southwest        | 44.8        | 27.9       | 14.3        | 1.6         | 88.6  |
| ICR        | Southwest        | 58.4        | 25         | 9.8         | 0           | 93.2  |
| ICR        | Southwest        | 63.5        | 23.7       | 8.9         | 0           | 96.1  |
| ICR        | Southwest        | 36          | 34         | 26          | 5.7         | 101.7 |
| ICR        | Southwest        | 30          | 38         | 28          | 6.9         | 102.9 |
| ICR        | Southwest        | 57.5        | 32.7       | 18.1        | 2.4         | 110.7 |
| ICR        | Southwest        | 92.1        | 22.7       | 5.6         | 0           | 120.4 |
| ICR        | Southwest        | 117         | 16.5       | 2.3         | 0           | 135.8 |
| <b>ICR</b> | <b>Southwest</b> | <b>32.6</b> | <b>3.1</b> |             | <b>13</b>   |       |
| <b>ICR</b> | <b>Southwest</b> | <b>14</b>   |            | <b>40.6</b> | <b>23.2</b> |       |
| SP 1       | Southeast        | 1.51        | 1.86       | 2.43        | 0           | 5.8   |
| SP 1       | Southeast        | 1.69        | 1.81       | 2.36        | 0           | 5.86  |
| SP 1       | Southeast        | 1.68        | 2.16       | 2.99        | 1.18        | 8.01  |
| SP 1       | Southeast        | 2.62        | 2.73       | 3.12        | 0           | 8.47  |
| SP 1       | Southeast        | 4.17        | 2.59       | 1.88        | 0           | 8.64  |
| SP 1       | Southeast        | 7.31        | 3.11       | 0           | 0           | 10.42 |
| SP 1       | Southeast        | 7.09        | 3.38       | 0           | 0           | 10.47 |
| SP 1       | Southeast        | 4.27        | 4.5        | 2.02        | 0           | 10.79 |
| SP 1       | Southeast        | 1.77        | 7.5        | 1.77        | 0           | 11.04 |
| SP 1       | Southeast        | 7.84        | 3.66       | 0           | 0           | 11.5  |
| SP 1       | Southeast        | 6.74        | 3.92       | 1.17        | 0           | 11.83 |
| SP 1       | Southeast        | 6.75        | 3.98       | 1.17        | 0           | 11.9  |
| SP 1       | Southeast        | 6.98        | 3.98       | 1.17        | 0           | 12.13 |
| SP 1       | Southeast        | 6.55        | 4.49       | 1.35        | 0           | 12.39 |
| SP 1       | Southeast        | 8.41        | 4.06       | 1.09        | 0           | 13.56 |
| SP 1       | Southeast        | 4.61        | 3.94       | 4.01        | 1.38        | 13.94 |
| SP 1       | Southeast        | 4.16        | 5.1        | 4.01        | 1.11        | 14.38 |
| SP 1       | Southeast        | 8.81        | 4.58       | 1.22        | 0           | 14.61 |
| SP 1       | Southeast        | 3.93        | 4.82       | 4.69        | 1.43        | 14.87 |
| SP 1       | Southeast        | 10.8        | 4.16       | 0           | 0           | 14.96 |
| SP 1       | Southeast        | 10.1        | 4.11       | 1.05        | 0           | 15.26 |
| SP 1       | Southeast        | 8.86        | 4.84       | 1.7         | 0           | 15.4  |
| SP 1       | Southeast        | 4.31        | 4.98       | 4.84        | 1.51        | 15.64 |
| SP 1       | Southeast        | 9.54        | 4.44       | 1.67        | 0           | 15.65 |
| SP 1       | Southeast        | 3.72        | 4.28       | 5.78        | 2.08        | 15.86 |
| SP 1       | Southeast        | 8.15        | 6.04       | 1.96        | 0           | 16.15 |

|      |           |      |      |      |      |       |
|------|-----------|------|------|------|------|-------|
| SP 1 | Southeast | 10.4 | 0    | 5.24 | 1.12 | 16.76 |
| SP 1 | Southeast | 5.89 | 5.43 | 5.45 | 1.19 | 17.96 |
| SP 1 | Southeast | 11.1 | 5.18 | 1.91 | 0    | 18.19 |
| SP 1 | Southeast | 11.2 | 5.09 | 2.04 | 0    | 18.33 |
| SP 1 | Southeast | 13.7 | 4.63 | 0    | 0    | 18.33 |
| SP 1 | Southeast | 6.61 | 5.66 | 5.51 | 1.2  | 18.98 |
| SP 1 | Southeast | 3.7  | 5.78 | 7.15 | 2.42 | 19.05 |
| SP 1 | Southeast | 12.1 | 5.14 | 1.88 | 0    | 19.12 |
| SP 1 | Southeast | 12.1 | 5.58 | 1.46 | 0    | 19.14 |
| SP 1 | Southeast | 14.9 | 4.61 | 0    | 0    | 19.51 |
| SP 1 | Southeast | 12.1 | 5.39 | 2.14 | 0    | 19.63 |
| SP 1 | Southeast | 12.6 | 5.32 | 1.98 | 0    | 19.9  |
| SP 1 | Southeast | 15.4 | 4.53 | 0    | 0    | 19.93 |
| SP 1 | Southeast | 16.4 | 3.7  | 0    | 0    | 20.1  |
| SP 1 | Southeast | 17.2 | 3.2  | 0    | 0    | 20.4  |
| SP 1 | Southeast | 4.04 | 6.32 | 7.48 | 2.58 | 20.42 |
| SP 1 | Southeast | 13.2 | 5.72 | 1.58 | 0    | 20.5  |
| SP 1 | Southeast | 13.6 | 5.43 | 1.84 | 0    | 20.87 |
| SP 1 | Southeast | 6.56 | 6.67 | 5.87 | 1.79 | 20.89 |
| SP 1 | Southeast | 16.8 | 4.74 | 0    | 0    | 21.54 |
| SP 1 | Southeast | 17.5 | 4.9  | 0    | 0    | 22.4  |
| SP 1 | Southeast | 18   | 4.69 | 0    | 0    | 22.69 |
| SP 1 | Southeast | 8.81 | 7.13 | 5.76 | 1.28 | 22.98 |
| SP 1 | Southeast | 19.4 | 3.9  | 0    | 0    | 23.3  |
| SP 1 | Southeast | 17.6 | 4.73 | 1.07 | 0    | 23.4  |
| SP 1 | Southeast | 11   | 6.53 | 4.8  | 1.14 | 23.47 |
| SP 1 | Southeast | 16.1 | 6.32 | 1.69 | 0    | 24.11 |
| SP 1 | Southeast | 18.3 | 4.82 | 1.16 | 0    | 24.28 |
| SP 1 | Southeast | 6.95 | 8.46 | 8.02 | 1.84 | 25.27 |
| SP 1 | Southeast | 19.9 | 4.8  | 0.6  | 0    | 25.3  |
| SP 1 | Southeast | 20.7 | 4.7  | 0    | 0    | 25.4  |
| SP 1 | Southeast | 15.8 | 7.6  | 2.3  | 0    | 25.7  |
| SP 1 | Southeast | 20.6 | 4.6  | 0.6  | 0    | 25.8  |
| SP 1 | Southeast | 11.2 | 8.84 | 5.87 | 0    | 25.91 |
| SP 1 | Southeast | 21.6 | 4.72 | 0    | 0    | 26.32 |
| SP 1 | Southeast | 20.9 | 4.8  | 0.7  | 0    | 26.4  |
| SP 1 | Southeast | 10   | 7.89 | 6.79 | 1.76 | 26.44 |
| SP 1 | Southeast | 21.6 | 4.9  | 0    | 0    | 26.5  |
| SP 1 | Southeast | 14.1 | 8.49 | 4.27 | 0    | 26.86 |
| SP 1 | Southeast | 21.6 | 4.9  | 0.7  | 0    | 27.2  |
| SP 1 | Southeast | 22.2 | 4.6  | 0.6  | 0    | 27.4  |

|      |           |      |      |      |      |       |
|------|-----------|------|------|------|------|-------|
| SP 1 | Southeast | 23.6 | 4    | 0    | 0    | 27.6  |
| SP 1 | Southeast | 13.8 | 8.63 | 5.29 | 0    | 27.72 |
| SP 1 | Southeast | 23.6 | 4.3  | 0    | 0    | 27.9  |
| SP 1 | Southeast | 22.9 | 4.7  | 0.6  | 0    | 28.2  |
| SP 1 | Southeast | 7.94 | 9.36 | 9.07 | 2.07 | 28.44 |
| SP 1 | Southeast | 8.86 | 8.45 | 8.44 | 2.7  | 28.45 |
| SP 1 | Southeast | 22.6 | 5.3  | 0.7  | 0    | 28.6  |
| SP 1 | Southeast | 23.2 | 4.9  | 0.6  | 0    | 28.7  |
| SP 1 | Southeast | 7.97 | 9.69 | 9.15 | 1.97 | 28.78 |
| SP 1 | Southeast | 23.7 | 4.8  | 0.6  | 0    | 29.1  |
| SP 1 | Southeast | 22.6 | 5.41 | 1.14 | 0    | 29.15 |
| SP 1 | Southeast | 23.5 | 5    | 0.7  | 0    | 29.2  |
| SP 1 | Southeast | 24.7 | 4.63 | 0    | 0    | 29.33 |
| SP 1 | Southeast | 22.9 | 5.28 | 1.15 | 0    | 29.33 |
| SP 1 | Southeast | 20.9 | 7.06 | 1.57 | 0    | 29.53 |
| SP 1 | Southeast | 25.8 | 4    | 0    | 0    | 29.8  |
| SP 1 | Southeast | 26   | 4.4  | 0    | 0    | 30.4  |
| SP 1 | Southeast | 10.6 | 9.64 | 8.1  | 2.23 | 30.57 |
| SP 1 | Southeast | 20.6 | 8.28 | 1.74 | 0    | 30.62 |
| SP 1 | Southeast | 21.9 | 6.84 | 2.12 | 0    | 30.86 |
| SP 1 | Southeast | 8.34 | 10.2 | 10.1 | 2.4  | 31.04 |
| SP 1 | Southeast | 13.2 | 9.38 | 7.44 | 1.36 | 31.38 |
| SP 1 | Southeast | 19.2 | 9.42 | 2.89 | 0    | 31.51 |
| SP 1 | Southeast | 27   | 4.6  | 0    | 0    | 31.6  |
| SP 1 | Southeast | 25.8 | 5.2  | 0.7  | 0    | 31.7  |
| SP 1 | Southeast | 17.7 | 7.67 | 5.5  | 1.01 | 31.88 |
| SP 1 | Southeast | 26.1 | 5.1  | 0.7  | 0    | 31.9  |
| SP 1 | Southeast | 26.2 | 5.3  | 0.7  | 0    | 32.2  |
| SP 1 | Southeast | 28   | 4.4  | 0    | 0    | 32.4  |
| SP 1 | Southeast | 18.9 | 10.4 | 3.1  | 0    | 32.4  |
| SP 1 | Southeast | 26.6 | 5.4  | 0.7  | 0    | 32.7  |
| SP 1 | Southeast | 11.6 | 10.6 | 8.88 | 1.77 | 32.85 |
| SP 1 | Southeast | 27.5 | 4.7  | 0.7  | 0    | 32.9  |
| SP 1 | Southeast | 16   | 10.4 | 6.51 | 0    | 32.91 |
| SP 1 | Southeast | 26.7 | 5.6  | 0.8  | 0    | 33.1  |
| SP 1 | Southeast | 27.6 | 5    | 0.6  | 0    | 33.2  |
| SP 1 | Southeast | 28   | 4.7  | 0.5  | 0    | 33.2  |
| SP 1 | Southeast | 26.7 | 5.6  | 0.9  | 0    | 33.2  |
| SP 1 | Southeast | 14.2 | 11.1 | 6.79 | 1.25 | 33.34 |
| SP 1 | Southeast | 28.1 | 4.8  | 0.6  | 0    | 33.5  |
| SP 1 | Southeast | 24.1 | 7.79 | 1.79 | 0    | 33.68 |

|      |           |      |      |      |      |       |
|------|-----------|------|------|------|------|-------|
| SP 1 | Southeast | 27.7 | 5.3  | 0.7  | 0    | 33.7  |
| SP 1 | Southeast | 25.7 | 6.54 | 1.7  | 0    | 33.94 |
| SP 1 | Southeast | 11.5 | 10.4 | 9.6  | 2.83 | 34.33 |
| SP 1 | Southeast | 24.9 | 7.54 | 2.33 | 0    | 34.77 |
| SP 1 | Southeast | 28.2 | 5.9  | 0.9  | 0    | 35    |
| SP 1 | Southeast | 30   | 5    | 0.5  | 0    | 35.5  |
| SP 1 | Southeast | 25.8 | 7.56 | 2.21 | 0    | 35.57 |
| SP 1 | Southeast | 27.1 | 6.82 | 1.7  | 0    | 35.62 |
| SP 1 | Southeast | 27.4 | 7.17 | 1.06 | 0    | 35.63 |
| SP 1 | Southeast | 14.1 | 12.4 | 8.49 | 1.25 | 36.24 |
| SP 1 | Southeast | 27.4 | 7.27 | 2.01 | 0    | 36.68 |
| SP 1 | Southeast | 16.7 | 12.1 | 6.77 | 1.38 | 36.95 |
| SP 1 | Southeast | 29.7 | 6.3  | 1    | 0    | 37    |
| SP 1 | Southeast | 20.8 | 10.2 | 6.04 | 0    | 37.04 |
| SP 1 | Southeast | 22.6 | 9.63 | 5.13 | 0    | 37.36 |
| SP 1 | Southeast | 11.8 | 12   | 11   | 2.86 | 37.66 |
| SP 1 | Southeast | 20   | 7.99 | 8.18 | 1.7  | 37.87 |
| SP 1 | Southeast | 29.4 | 7.19 | 1.59 | 0    | 38.18 |
| SP 1 | Southeast | 25.3 | 10.3 | 2.9  | 0    | 38.5  |
| SP 1 | Southeast | 33.2 | 4.9  | 0.6  | 0    | 38.7  |
| SP 1 | Southeast | 32   | 5.9  | 0.8  | 0    | 38.7  |
| SP 1 | Southeast | 29.7 | 7.28 | 1.84 | 0    | 38.82 |
| SP 1 | Southeast | 25.4 | 11   | 3    | 0    | 39.4  |
| SP 1 | Southeast | 20.8 | 11.6 | 6.19 | 1.1  | 39.69 |
| SP 1 | Southeast | 33   | 5.7  | 1    | 0    | 39.7  |
| SP 1 | Southeast | 30.4 | 7.52 | 1.82 | 0    | 39.74 |
| SP 1 | Southeast | 34.7 | 4.7  | 0.6  | 0    | 40    |
| SP 1 | Southeast | 34   | 5.8  | 0.7  | 0    | 40.5  |
| SP 1 | Southeast | 31.7 | 7.3  | 1.71 | 0    | 40.71 |
| SP 1 | Southeast | 35.6 | 5    | 0.6  | 0    | 41.2  |
| SP 1 | Southeast | 26.2 | 12.4 | 3.4  | 0    | 42    |
| SP 1 | Southeast | 36.2 | 5.4  | 0.6  | 0    | 42.2  |
| SP 1 | Southeast | 31.9 | 8.54 | 1.76 | 0    | 42.2  |
| SP 1 | Southeast | 35.8 | 6    | 0.8  | 0    | 42.6  |
| SP 1 | Southeast | 20.2 | 13.6 | 7.79 | 1.13 | 42.72 |
| SP 1 | Southeast | 15.4 | 13   | 11.8 | 2.54 | 42.74 |
| SP 1 | Southeast | 36.2 | 6    | 0.8  | 0    | 43    |
| SP 1 | Southeast | 36   | 6.2  | 0.8  | 0    | 43    |
| SP 1 | Southeast | 37.6 | 5.1  | 0.7  | 0    | 43.4  |
| SP 1 | Southeast | 35.2 | 7.03 | 1.42 | 0    | 43.65 |
| SP 1 | Southeast | 38.1 | 5.5  | 0.6  | 0    | 44.2  |

|      |           |      |      |      |      |        |
|------|-----------|------|------|------|------|--------|
| SP 1 | Southeast | 35.7 | 6.93 | 1.64 | 0    | 44.27  |
| SP 1 | Southeast | 35.3 | 7.6  | 1.74 | 0    | 44.64  |
| SP 1 | Southeast | 34.8 | 8.25 | 1.91 | 0    | 44.96  |
| SP 1 | Southeast | 38.7 | 5.6  | 0.8  | 0    | 45.1   |
| SP 1 | Southeast | 38.4 | 6    | 0.9  | 0    | 45.3   |
| SP 1 | Southeast | 38   | 6.4  | 0.9  | 0    | 45.3   |
| SP 1 | Southeast | 38.4 | 6.3  | 0.7  | 0    | 45.4   |
| SP 1 | Southeast | 36   | 8.29 | 1.88 | 0    | 46.17  |
| SP 1 | Southeast | 40.8 | 5.3  | 0.6  | 0    | 46.7   |
| SP 1 | Southeast | 32.2 | 11.9 | 2.8  | 0    | 46.9   |
| SP 1 | Southeast | 38   | 7.89 | 1.25 | 0    | 47.14  |
| SP 1 | Southeast | 35.9 | 8.85 | 2.44 | 0    | 47.19  |
| SP 1 | Southeast | 40.6 | 6    | 0.9  | 0    | 47.5   |
| SP 1 | Southeast | 18.9 | 15.6 | 11.8 | 1.98 | 48.28  |
| SP 1 | Southeast | 31.8 | 13.3 | 3.2  | 0    | 48.3   |
| SP 1 | Southeast | 41.6 | 6    | 0.8  | 0    | 48.4   |
| SP 1 | Southeast | 9.77 | 38.9 | 0    | 0    | 48.67  |
| SP 1 | Southeast | 31.4 | 13.9 | 3.4  | 0    | 48.7   |
| SP 1 | Southeast | 25.8 | 14.6 | 7.62 | 1.01 | 49.03  |
| SP 1 | Southeast | 41   | 7.1  | 1    | 0    | 49.1   |
| SP 1 | Southeast | 40   | 8.06 | 1.11 | 0    | 49.17  |
| SP 1 | Southeast | 42   | 6.5  | 0.9  | 0    | 49.4   |
| SP 1 | Southeast | 42.4 | 8.63 | 1.23 | 0    | 52.26  |
| SP 1 | Southeast | 33   | 14.9 | 5.32 | 0    | 53.22  |
| SP 1 | Southeast | 46.2 | 7.2  | 1    | 0    | 54.4   |
| SP 1 | Southeast | 43.4 | 10.6 | 2.24 | 0    | 56.24  |
| SP 1 | Southeast | 42.2 | 12.3 | 2.58 | 0    | 57.08  |
| SP 1 | Southeast | 32.5 | 16.6 | 7.99 | 0    | 57.09  |
| SP 1 | Southeast | 48.4 | 8.54 | 1.13 | 0    | 58.07  |
| SP 1 | Southeast | 47.4 | 14.6 | 2.7  | 0    | 64.7   |
| SP 1 | Southeast | 50.3 | 11.9 | 2.89 | 0    | 65.09  |
| SP 1 | Southeast | 40.5 | 18.5 | 7.36 | 0    | 66.36  |
| SP 1 | Southeast | 57   | 8.74 | 2.3  | 0    | 68.04  |
| SP 1 | Southeast | 54.3 | 15.9 | 2.9  | 0    | 73.1   |
| SP 1 | Southeast | 66.6 | 17.2 | 2.2  | 0    | 86     |
| SP 1 | Southeast | 73.5 | 15.3 | 2.9  | 0    | 91.7   |
| SP 1 | Southeast | 74.6 | 19.1 | 2.8  | 0    | 96.5   |
| SP 1 | Southeast | 73.6 | 21   | 5.65 | 0    | 100.25 |
| SP 1 | Southeast | 76.5 | 20.6 | 5.28 | 0    | 102.38 |
| SP 1 | Southeast | 80.1 | 18.9 | 5.26 | 0    | 104.26 |
| SP 1 | Southeast | 76.4 | 24.5 | 4.9  | 0    | 105.8  |

|      |           |      |      |      |     |        |
|------|-----------|------|------|------|-----|--------|
| SP 1 | Southeast | 84.1 | 19.2 | 2.6  | 0   | 105.9  |
| SP 1 | Southeast | 83.2 | 20.6 | 5.33 | 0   | 109.13 |
| SP 1 | Southeast | 86   | 21.7 | 2.9  | 0   | 110.6  |
| SP 1 | Southeast | 86.9 | 24.4 | 6.22 | 0   | 117.52 |
| SP 1 | Southeast | 99.4 | 19.9 | 4.42 | 0   | 123.72 |
| SP 1 | Southeast | 107  | 20.7 | 3.5  | 0   | 131.2  |
| SP 1 | Southwest | 9    | 6    | 2    | 0   | 17     |
| SP 1 | Southwest | 10   | 7    | 2    | 0   | 19     |
| SP 1 | Southwest | 11   | 7    | 2    | 0   | 20     |
| SP 1 | Southwest | 14   | 6    | 1    | 0   | 21     |
| SP 1 | Southwest | 14   | 6    | 1    | 0   | 21     |
| SP 1 | Southwest | 4.7  | 6.3  | 7    | 3   | 21     |
| SP 1 | Southwest | 12   | 7    | 2    | 0   | 21     |
| SP 1 | Southwest | 13   | 7    | 2    | 0   | 22     |
| SP 1 | Southwest | 12   | 8    | 2    | 0   | 22     |
| SP 1 | Southwest | 12   | 8    | 2    | 0   | 22     |
| SP 1 | Southwest | 4.5  | 6.6  | 7.9  | 3.4 | 22.4   |
| SP 1 | Southwest | 15   | 7    | 1    | 0   | 23     |
| SP 1 | Southwest | 13   | 8    | 2    | 0   | 23     |
| SP 1 | Southwest | 13   | 8    | 2    | 0   | 23     |
| SP 1 | Southwest | 5.8  | 7.2  | 7.5  | 3.2 | 23.7   |
| SP 1 | Southwest | 16   | 7    | 2    | 0   | 25     |
| SP 1 | Southwest | 15   | 8    | 2    | 0   | 25     |
| SP 1 | Southwest | 16   | 7    | 2.3  | 0   | 25.3   |
| SP 1 | Southwest | 9.2  | 7.5  | 7    | 1.9 | 25.6   |
| SP 1 | Southwest | 7.3  | 8.2  | 7.7  | 2.7 | 25.9   |
| SP 1 | Southwest | 16   | 8    | 2    | 0   | 26     |
| SP 1 | Southwest | 18   | 6.6  | 1.6  | 0   | 26.2   |
| SP 1 | Southwest | 7.6  | 8.6  | 7.7  | 2.6 | 26.5   |
| SP 1 | Southwest | 17   | 8    | 2    | 0   | 27     |
| SP 1 | Southwest | 17   | 8.5  | 1.9  | 0   | 27.4   |
| SP 1 | Southwest | 16.2 | 9    | 2.5  | 0   | 27.7   |
| SP 1 | Southwest | 18   | 8    | 2    | 0   | 28     |
| SP 1 | Southwest | 18   | 8    | 2    | 0   | 28     |
| SP 1 | Southwest | 17   | 8    | 3    | 0   | 28     |
| SP 1 | Southwest | 19   | 7.5  | 2.2  | 0   | 28.7   |
| SP 1 | Southwest | 8.6  | 9    | 8.3  | 3   | 28.9   |
| SP 1 | Southwest | 7.5  | 9.2  | 9.1  | 3.4 | 29.2   |
| SP 1 | Southwest | 17.5 | 9.3  | 2.7  | 0   | 29.5   |
| SP 1 | Southwest | 10   | 9.6  | 7.8  | 2.3 | 29.7   |
| SP 1 | Southwest | 18.4 | 9.2  | 2.5  | 0   | 30.1   |



|      |           |      |      |      |     |       |
|------|-----------|------|------|------|-----|-------|
| SP 1 | Southwest | 10.5 | 10   | 7.6  | 2   | 30.1  |
| SP 1 | Southwest | 18.8 | 8.8  | 2.7  | 0   | 30.3  |
| SP 1 | Southwest | 18.1 | 9.5  | 3    | 0   | 30.6  |
| SP 1 | Southwest | 19   | 9.2  | 2.6  | 0   | 30.8  |
| SP 1 | Southwest | 21   | 8    | 2    | 0   | 31    |
| SP 1 | Southwest | 19.8 | 8.9  | 2.3  | 0   | 31    |
| SP 1 | Southwest | 20   | 9    | 2    | 0   | 31    |
| SP 1 | Southwest | 17   | 9    | 4.3  | 0.9 | 31.2  |
| SP 1 | Southwest | 19.1 | 9.7  | 2.5  | 0   | 31.3  |
| SP 1 | Southwest | 19.3 | 9.4  | 2.8  | 0   | 31.5  |
| SP 1 | Southwest | 19.3 | 9.4  | 2.9  | 0   | 31.6  |
| SP 1 | Southwest | 22   | 7.6  | 2.2  | 0   | 31.8  |
| SP 1 | Southwest | 10.9 | 10.4 | 8.3  | 2.4 | 32    |
| SP 1 | Southwest | 10   | 10   | 9.2  | 3   | 32.2  |
| SP 1 | Southwest | 20   | 9.6  | 2.7  | 0   | 32.3  |
| SP 1 | Southwest | 20.4 | 9.4  | 2.7  | 0   | 32.5  |
| SP 1 | Southwest | 14   | 9.7  | 6.8  | 2   | 32.5  |
| SP 1 | Southwest | 20.9 | 9.5  | 2.6  | 0   | 33    |
| SP 1 | Southwest | 23   | 8.1  | 2.1  | 0   | 33.2  |
| SP 1 | Southwest | 21.1 | 9.4  | 2.7  | 0   | 33.2  |
| SP 1 | Southwest | 14   | 9.6  | 7.3  | 2.3 | 33.2  |
| SP 1 | Southwest | 12.6 | 11   | 7.9  | 1.9 | 33.4  |
| SP 1 | Southwest | 23   | 8.2  | 2.3  | 0   | 33.5  |
| SP 1 | Southwest | 14   | 9.7  | 7.5  | 2.3 | 33.5  |
| SP 1 | Southwest | 20.8 | 9.9  | 2.9  | 0   | 33.6  |
| SP 1 | Southwest | 11   | 10   | 9.5  | 3.1 | 33.6  |
| SP 1 | Southwest | 12.9 | 11   | 7.9  | 1.9 | 33.7  |
| SP 1 | Southwest | 11   | 9.9  | 9.6  | 3.3 | 33.8  |
| SP 1 | Southwest | 23   | 9    | 2    | 0   | 34    |
| SP 1 | Southwest | 11   | 11   | 9.2  | 3.1 | 34.3  |
| SP 1 | Southwest | 15   | 10   | 7.5  | 2.3 | 34.8  |
| SP 1 | Southwest | 24   | 9    | 2    | 0   | 35    |
| SP 1 | Southwest | 22   | 10   | 3    | 0   | 35    |
| SP 1 | Southwest | 15   | 10   | 7.7  | 2.3 | 35    |
| SP 1 | Southwest | 21.2 | 10.1 | 3.9  | 0   | 35.2  |
| SP 1 | Southwest | 16   | 9.9  | 7.3  | 2.2 | 35.4  |
| SP 1 | Southwest | 15   | 10   | 8    | 2.5 | 35.5  |
| SP 1 | Southwest | 12   | 12   | 9.4  | 2.4 | 35.8  |
| SP 1 | Southwest | 21   | 10   | 4.3  | 0.6 | 35.9  |
| SP 1 | Southwest | 16.6 | 14.7 | 5.01 | 0   | 36.31 |
| SP 1 | Southwest | 14.7 | 15.6 | 6.15 | 0   | 36.45 |

|      |           |      |      |      |      |       |
|------|-----------|------|------|------|------|-------|
| SP 1 | Southwest | 8.96 | 14.1 | 11.5 | 1.93 | 36.49 |
| SP 1 | Southwest | 21.2 | 11   | 4.3  | 0    | 36.5  |
| SP 1 | Southwest | 12.6 | 13.8 | 8.1  | 2.3  | 36.8  |
| SP 1 | Southwest | 12.5 | 14.6 | 8.2  | 1.9  | 37.2  |
| SP 1 | Southwest | 9.38 | 14.3 | 11.6 | 2    | 37.28 |
| SP 1 | Southwest | 12.1 | 14.3 | 8.7  | 2.2  | 37.3  |
| SP 1 | Southwest | 16.5 | 14.6 | 6.39 | 0    | 37.49 |
| SP 1 | Southwest | 8.8  | 12   | 13   | 4    | 37.8  |
| SP 1 | Southwest | 26   | 10   | 2    | 0    | 38    |
| SP 1 | Southwest | 8.8  | 12   | 13   | 4.2  | 38    |
| SP 1 | Southwest | 27.9 | 8.8  | 1.7  | 0    | 38.4  |
| SP 1 | Southwest | 9.1  | 13   | 13   | 3.6  | 38.7  |
| SP 1 | Southwest | 23.8 | 11.1 | 4.1  | 0    | 39    |
| SP 1 | Southwest | 17   | 12   | 8.3  | 2.1  | 39.4  |
| SP 1 | Southwest | 17.6 | 12.2 | 7.8  | 1.8  | 39.4  |
| SP 1 | Southwest | 28.2 | 9.4  | 2    | 0    | 39.6  |
| SP 1 | Southwest | 25.5 | 10.9 | 3.2  | 0    | 39.6  |
| SP 1 | Southwest | 10.1 | 15   | 12.3 | 2.25 | 39.65 |
| SP 1 | Southwest | 17.3 | 15.3 | 7.15 | 0    | 39.75 |
| SP 1 | Southwest | 19.9 | 15.2 | 5.3  | 0    | 40.4  |
| SP 1 | Southwest | 17.6 | 15.5 | 7.31 | 0    | 40.41 |
| SP 1 | Southwest | 29.8 | 8.9  | 1.8  | 0    | 40.5  |
| SP 1 | Southwest | 14.9 | 13.4 | 10.2 | 2    | 40.5  |
| SP 1 | Southwest | 21.5 | 14.2 | 4.91 | 0    | 40.61 |
| SP 1 | Southwest | 18.1 | 15.6 | 7.13 | 0    | 40.83 |
| SP 1 | Southwest | 30.5 | 8.7  | 1.8  | 0    | 41    |
| SP 1 | Southwest | 29   | 10   | 2    | 0    | 41    |
| SP 1 | Southwest | 30.7 | 9    | 1.6  | 0    | 41.3  |
| SP 1 | Southwest | 10   | 13   | 14   | 4.4  | 41.4  |
| SP 1 | Southwest | 28.6 | 10.6 | 2.2  | 0    | 41.4  |
| SP 1 | Southwest | 8.25 | 14.2 | 14.4 | 4.83 | 41.68 |
| SP 1 | Southwest | 20.1 | 15.5 | 6.19 | 0    | 41.79 |
| SP 1 | Southwest | 16   | 13   | 10   | 2.8  | 41.8  |
| SP 1 | Southwest | 10.5 | 14.8 | 13.4 | 3.24 | 41.94 |
| SP 1 | Southwest | 19.1 | 15.9 | 7.12 | 0    | 42.12 |
| SP 1 | Southwest | 7.61 | 15.7 | 15.1 | 3.73 | 42.14 |
| SP 1 | Southwest | 31.7 | 8.9  | 1.6  | 0    | 42.2  |
| SP 1 | Southwest | 28.3 | 11   | 3    | 0    | 42.3  |
| SP 1 | Southwest | 22.5 | 14.9 | 4.98 | 0    | 42.38 |
| SP 1 | Southwest | 18.8 | 12.7 | 8.9  | 2.1  | 42.5  |
| SP 1 | Southwest | 31.9 | 9    | 1.7  | 0    | 42.6  |

|      |           |      |      |      |      |       |
|------|-----------|------|------|------|------|-------|
| SP 1 | Southwest | 18.9 | 16.3 | 7.4  | 0    | 42.6  |
| SP 1 | Southwest | 13.4 | 16.4 | 10.2 | 2.7  | 42.7  |
| SP 1 | Southwest | 30.5 | 10.5 | 1.75 | 0    | 42.75 |
| SP 1 | Southwest | 23.6 | 14.9 | 4.97 | 0    | 43.47 |
| SP 1 | Southwest | 19   | 13   | 8.8  | 2.9  | 43.7  |
| SP 1 | Southwest | 10.9 | 15.3 | 14.1 | 3.48 | 43.78 |
| SP 1 | Southwest | 3.9  | 9.4  | 15.4 | 15.2 | 43.9  |
| SP 1 | Southwest | 15.7 | 16.6 | 9.4  | 2.5  | 44.2  |
| SP 1 | Southwest | 36.1 | 8.19 | 0    | 0    | 44.29 |
| SP 1 | Southwest | 27.8 | 12.6 | 4    | 0    | 44.4  |
| SP 1 | Southwest | 20.9 | 13.9 | 8    | 1.6  | 44.4  |
| SP 1 | Southwest | 23   | 13   | 6.7  | 1.8  | 44.5  |
| SP 1 | Southwest | 12   | 15   | 14   | 4    | 45    |
| SP 1 | Southwest | 13   | 17.7 | 11.2 | 3.1  | 45    |
| SP 1 | Southwest | 31.1 | 11.5 | 2.5  | 0    | 45.1  |
| SP 1 | Southwest | 31   | 11.8 | 2.6  | 0    | 45.4  |
| SP 1 | Southwest | 27.6 | 13.1 | 4.7  | 0    | 45.4  |
| SP 1 | Southwest | 20   | 14.4 | 9.4  | 1.6  | 45.4  |
| SP 1 | Southwest | 28.6 | 12.3 | 4.9  | 0    | 45.8  |
| SP 1 | Southwest | 32   | 11.7 | 2.7  | 0    | 46.4  |
| SP 1 | Southwest | 21.8 | 14.7 | 8.4  | 1.7  | 46.6  |
| SP 1 | Southwest | 27.8 | 13.7 | 5.5  | 0    | 47    |
| SP 1 | Southwest | 25.9 | 15.8 | 5.49 | 0    | 47.19 |
| SP 1 | Southwest | 11   | 15   | 16   | 5.5  | 47.5  |
| SP 1 | Southwest | 30   | 12   | 5.1  | 0.7  | 47.8  |
| SP 1 | Southwest | 21.8 | 15.3 | 8.9  | 1.8  | 47.8  |
| SP 1 | Southwest | 35   | 11   | 2    | 0    | 48    |
| SP 1 | Southwest | 28.7 | 13.6 | 5.8  | 0    | 48.1  |
| SP 1 | Southwest | 17.3 | 17.7 | 10.4 | 2.8  | 48.2  |
| SP 1 | Southwest | 10.9 | 17.1 | 16.5 | 3.81 | 48.31 |
| SP 1 | Southwest | 21.4 | 15.6 | 9.9  | 1.7  | 48.6  |
| SP 1 | Southwest | 19.4 | 18   | 9.1  | 2.1  | 48.6  |
| SP 1 | Southwest | 36   | 11   | 2    | 0    | 49    |
| SP 1 | Southwest | 36   | 11   | 2    | 0    | 49    |
| SP 1 | Southwest | 23.2 | 15.2 | 8.9  | 1.8  | 49.1  |
| SP 1 | Southwest | 18   | 15   | 12   | 4.2  | 49.2  |
| SP 1 | Southwest | 36   | 11.4 | 2.16 | 0    | 49.56 |
| SP 1 | Southwest | 7.4  | 16.1 | 18.4 | 7.85 | 49.75 |
| SP 1 | Southwest | 27.7 | 15.6 | 6.6  | 0    | 49.9  |
| SP 1 | Southwest | 22.7 | 16.1 | 9.4  | 1.8  | 50    |
| SP 1 | Southwest | 14   | 17   | 15   | 4.2  | 50.2  |

|      |           |      |      |      |      |       |
|------|-----------|------|------|------|------|-------|
| SP 1 | Southwest | 14   | 17   | 15   | 4.5  | 50.5  |
| SP 1 | Southwest | 24.4 | 15.6 | 8.9  | 1.8  | 50.7  |
| SP 1 | Southwest | 18.9 | 17.6 | 11   | 3.21 | 50.71 |
| SP 1 | Southwest | 38   | 11   | 2    | 0    | 51    |
| SP 1 | Southwest | 32.9 | 13   | 5.1  | 0    | 51    |
| SP 1 | Southwest | 27.9 | 15.5 | 6.7  | 1.2  | 51.3  |
| SP 1 | Southwest | 26.3 | 14.3 | 8.9  | 1.9  | 51.4  |
| SP 1 | Southwest | 24.4 | 16   | 9.5  | 1.5  | 51.4  |
| SP 1 | Southwest | 32.5 | 13.9 | 5.2  | 0    | 51.6  |
| SP 1 | Southwest | 11.4 | 16.3 | 16.9 | 7.03 | 51.63 |
| SP 1 | Southwest | 28   | 14   | 8.2  | 2.1  | 52.3  |
| SP 1 | Southwest | 39.8 | 11.3 | 1.22 | 0    | 52.32 |
| SP 1 | Southwest | 28.3 | 17.4 | 6.84 | 0    | 52.54 |
| SP 1 | Southwest | 39   | 12   | 2    | 0    | 53    |
| SP 1 | Southwest | 39   | 12   | 2    | 0    | 53    |
| SP 1 | Southwest | 22.1 | 18   | 10.6 | 2.68 | 53.38 |
| SP 1 | Southwest | 20.4 | 19.9 | 10.5 | 2.7  | 53.5  |
| SP 1 | Southwest | 15   | 17   | 17   | 4.9  | 53.9  |
| SP 1 | Southwest | 41   | 11.1 | 2.02 | 0    | 54.12 |
| SP 1 | Southwest | 16   | 18   | 16   | 4.4  | 54.4  |
| SP 1 | Southwest | 32.2 | 16.2 | 6.4  | 0    | 54.8  |
| SP 1 | Southwest | 26   | 16   | 10   | 3    | 55    |
| SP 1 | Southwest | 4.3  | 11.1 | 18   | 21.9 | 55.3  |
| SP 1 | Southwest | 28.8 | 16.8 | 8.3  | 1.4  | 55.3  |
| SP 1 | Southwest | 11.1 | 18.5 | 20.4 | 5.35 | 55.35 |
| SP 1 | Southwest | 33.2 | 16   | 6.2  | 0    | 55.4  |
| SP 1 | Southwest | 19.9 | 18.8 | 14.1 | 3    | 55.8  |
| SP 1 | Southwest | 32.7 | 16.9 | 6.8  | 0    | 56.4  |
| SP 1 | Southwest | 22.1 | 20.6 | 10.9 | 2.8  | 56.4  |
| SP 1 | Southwest | 39.3 | 13.7 | 3.6  | 0    | 56.6  |
| SP 1 | Southwest | 37.5 | 13.8 | 5.5  | 0    | 56.8  |
| SP 1 | Southwest | 12   | 16   | 20   | 8.8  | 56.8  |
| SP 1 | Southwest | 28   | 17   | 9.6  | 2.2  | 56.8  |
| SP 1 | Southwest | 37.3 | 14.3 | 5.6  | 0    | 57.2  |
| SP 1 | Southwest | 37.9 | 14.1 | 5.5  | 0    | 57.5  |
| SP 1 | Southwest | 30   | 19.3 | 8.44 | 0    | 57.74 |
| SP 1 | Southwest | 19.8 | 19.1 | 15.8 | 3.1  | 57.8  |
| SP 1 | Southwest | 18   | 20   | 16   | 3.8  | 57.8  |
| SP 1 | Southwest | 40.8 | 14.6 | 3.38 | 0    | 58.78 |
| SP 1 | Southwest | 12.1 | 19   | 21.1 | 6.63 | 58.83 |
| SP 1 | Southwest | 22.3 | 21.3 | 12   | 3.5  | 59.1  |

|      |           |      |      |      |      |       |
|------|-----------|------|------|------|------|-------|
| SP 1 | Southwest | 22.8 | 22   | 11.7 | 3.1  | 59.6  |
| SP 1 | Southwest | 30.9 | 19.7 | 9.05 | 0    | 59.65 |
| SP 1 | Southwest | 12.6 | 20.2 | 21.5 | 5.45 | 59.75 |
| SP 1 | Southwest | 16   | 19   | 19   | 5.8  | 59.8  |
| SP 1 | Southwest | 11.6 | 18.6 | 21.8 | 8.16 | 60.16 |
| SP 1 | Southwest | 40.3 | 14.7 | 5.3  | 0    | 60.3  |
| SP 1 | Southwest | 8.2  | 15.1 | 20.8 | 16.2 | 60.3  |
| SP 1 | Southwest | 20   | 20   | 17   | 4.1  | 61.1  |
| SP 1 | Southwest | 28   | 18   | 12   | 3.8  | 61.8  |
| SP 1 | Southwest | 16.4 | 19.8 | 19.8 | 5.8  | 61.8  |
| SP 1 | Southwest | 42.8 | 14.4 | 5.3  | 0    | 62.5  |
| SP 1 | Southwest | 45.3 | 13.7 | 4.61 | 0    | 63.61 |
| SP 1 | Southwest | 47.6 | 13.3 | 3.79 | 0    | 64.69 |
| SP 1 | Southwest | 43.7 | 16.6 | 4.4  | 0    | 64.7  |
| SP 1 | Southwest | 35   | 19   | 9    | 2    | 65    |
| SP 1 | Southwest | 36   | 20   | 9    | 2    | 67    |
| SP 1 | Southwest | 17.2 | 20.7 | 21.3 | 7.82 | 67.02 |
| SP 1 | Southwest | 11.2 | 17.9 | 25.4 | 12.7 | 67.2  |
| SP 1 | Southwest | 14.2 | 19.5 | 24.9 | 9.3  | 67.9  |
| SP 1 | Southwest | 27   | 22   | 16   | 3.7  | 68.7  |
| SP 1 | Southwest | 5.8  | 14.9 | 28.3 | 20   | 69    |
| SP 1 | Southwest | 3.3  | 13.6 | 25   | 27.4 | 69.3  |
| SP 1 | Southwest | 36   | 20   | 11   | 3    | 70    |
| SP 1 | Southwest | 50.2 | 15.1 | 4.8  | 0    | 70.1  |
| SP 1 | Southwest | 15.9 | 22   | 24.9 | 8.2  | 71    |
| SP 1 | Southwest | 49.6 | 16.1 | 5.5  | 0    | 71.2  |
| SP 1 | Southwest | 26.5 | 22.3 | 18.7 | 4.1  | 71.6  |
| SP 1 | Southwest | 54.1 | 13.7 | 3.93 | 0    | 71.73 |
| SP 1 | Southwest | 28   | 23   | 17   | 3.9  | 71.9  |
| SP 1 | Southwest | 37   | 21   | 11   | 3    | 72    |
| SP 1 | Southwest | 22.7 | 22.5 | 22.4 | 5.3  | 72.9  |
| SP 1 | Southwest | 41   | 20   | 10   | 2    | 73    |
| SP 1 | Southwest | 18.6 | 22.9 | 24.5 | 7.4  | 73.4  |
| SP 1 | Southwest | 43   | 20   | 9    | 2    | 74    |
| SP 1 | Southwest | 44   | 21   | 8    | 1    | 74    |
| SP 1 | Southwest | 38   | 22   | 11   | 3    | 74    |
| SP 1 | Southwest | 6.7  | 17.1 | 34.3 | 16.1 | 74.2  |
| SP 1 | Southwest | 4.8  | 14.6 | 27.3 | 29.2 | 75.9  |
| SP 1 | Southwest | 51.6 | 17.9 | 6.6  | 0    | 76.1  |
| SP 1 | Southwest | 7.4  | 16.7 | 27.7 | 24.7 | 76.5  |
| SP 1 | Southwest | 6.7  | 17.9 | 31.8 | 20.9 | 77.3  |

|      |           |      |      |      |      |       |
|------|-----------|------|------|------|------|-------|
| SP 1 | Southwest | 16.3 | 24.2 | 27.4 | 10.1 | 78    |
| SP 1 | Southwest | 26.3 | 24   | 22.6 | 6    | 78.9  |
| SP 1 | Southwest | 5.2  | 15.8 | 28.8 | 30.7 | 80.5  |
| SP 1 | Southwest | 30.2 | 24.5 | 21.1 | 4.7  | 80.5  |
| SP 1 | Southwest | 56.5 | 18.5 | 6.4  | 0    | 81.4  |
| SP 1 | Southwest | 60.5 | 16.2 | 4.89 | 0    | 81.59 |
| SP 1 | Southwest | 51.8 | 21.9 | 8.1  | 1    | 82.8  |
| SP 1 | Southwest | 11.7 | 21.1 | 32.7 | 18   | 83.5  |
| SP 1 | Southwest | 46   | 26   | 11   | 1    | 84    |
| SP 1 | Southwest | 31   | 25.5 | 23.3 | 5.7  | 85.5  |
| SP 1 | Southwest | 28.4 | 26.6 | 24.4 | 6.1  | 85.5  |
| SP 1 | Southwest | 6.5  | 17   | 30.2 | 32   | 85.7  |
| SP 1 | Southwest | 9.3  | 19.1 | 30.8 | 26.7 | 85.9  |
| SP 1 | Southwest | 30.8 | 26.8 | 23.7 | 5.7  | 87    |
| SP 1 | Southwest | 47.3 | 29   | 10.7 | 0    | 87    |
| SP 1 | Southwest | 60.3 | 19.9 | 7    | 0    | 87.2  |
| SP 1 | Southwest | 21.2 | 26.5 | 30.5 | 9.5  | 87.7  |
| SP 1 | Southwest | 57.6 | 21   | 8.8  | 1.2  | 88.6  |
| SP 1 | Southwest | 57.5 | 21.4 | 8.7  | 1.2  | 88.8  |
| SP 1 | Southwest | 13.2 | 22.3 | 35.5 | 20.7 | 91.7  |
| SP 1 | Southwest | 62   | 20.9 | 8.1  | 1    | 92    |
| SP 1 | Southwest | 9.8  | 22.7 | 38   | 23.5 | 94    |
| SP 1 | Southwest | 62.7 | 23.6 | 7.8  | 0    | 94.1  |
| SP 1 | Southwest | 63.9 | 21.9 | 8.6  | 1.1  | 95.5  |
| SP 1 | Southwest | 11.7 | 24.7 | 39.3 | 24.2 | 99.9  |
| SP 1 | Southwest | 64.7 | 25.2 | 9    | 1.1  | 100   |
| SP 1 | Southwest | 38.9 | 30.9 | 25.3 | 5.9  | 101   |
| SP 1 | Southwest | 73.2 | 21.8 | 7.5  | 0    | 102.5 |
| SP 1 | Southwest | 12.8 | 24.8 | 38.9 | 26.2 | 102.7 |
| SP 1 | Southwest | 10.1 | 24.4 | 39.3 | 30   | 103.8 |
| SP 1 | Southwest | 10.4 | 24.2 | 39.7 | 29.7 | 104   |
| SP 1 | Southwest | 61   | 30   | 12   | 2    | 105   |
| SP 1 | Southwest | 68   | 26.8 | 9.3  | 1.1  | 105.2 |
| SP 1 | Southwest | 43.3 | 32   | 25.4 | 5.9  | 106.6 |
| SP 1 | Southwest | 40.6 | 32.3 | 27.2 | 6.5  | 106.6 |
| SP 1 | Southwest | 42.9 | 33.7 | 27.9 | 5.9  | 110.4 |
| SP 1 | Southwest | 64   | 33   | 12   | 2    | 111   |
| SP 1 | Southwest | 13.4 | 28.5 | 39.1 | 30.2 | 111.2 |
| SP 1 | Southwest | 65   | 32   | 14   | 2    | 113   |
| SP 1 | Southwest | 14.2 | 28   | 39.7 | 31.2 | 113.1 |
| SP 1 | Southwest | 12.1 | 27.3 | 39.3 | 35.3 | 114   |

|             |                  |             |             |             |             |       |
|-------------|------------------|-------------|-------------|-------------|-------------|-------|
| SP 1        | Southwest        | 45.4        | 36.2        | 28.8        | 6.4         | 116.8 |
| SP 1        | Southwest        | 44.7        | 36.8        | 29.8        | 7           | 118.3 |
| SP 1        | Southwest        | 48.3        | 36.7        | 28.5        | 6.5         | 120   |
| SP 1        | Southwest        | 47.6        | 36.7        | 29.3        | 6.6         | 120.2 |
| SP 1        | Southwest        | 47          | 38.2        | 29.1        | 6.3         | 120.6 |
| <b>SP 1</b> | <b>Southwest</b> | <b>12.3</b> | <b>10.5</b> |             | <b>2.1</b>  |       |
| <b>SP 1</b> | <b>Southwest</b> |             | <b>11.5</b> |             |             |       |
| <b>SP 1</b> | <b>Southwest</b> |             |             | <b>7.9</b>  |             |       |
| <b>SP 1</b> | <b>Southwest</b> | <b>4.1</b>  |             | <b>23.7</b> | <b>20.8</b> |       |
| SP 2        | Southeast        | 1.8         | 1.2         | 1.4         | 0           | 4.4   |
| SP 2        | Southeast        | 1.8         | 1.9         | 1.8         | 0.8         | 6.3   |
| SP 2        | Southeast        | 1.3         | 1.9         | 2.4         | 0.8         | 6.4   |
| SP 2        | Southeast        | 1.4         | 2.2         | 2.7         | 0.9         | 7.2   |
| SP 2        | Southeast        | 2.1         | 2.5         | 2.5         | 0.9         | 8     |
| SP 2        | Southeast        | 3.1         | 2.8         | 2.4         | 0.6         | 8.9   |
| SP 2        | Southeast        | 3.3         | 3.2         | 2.9         | 0.7         | 10.1  |
| SP 2        | Southeast        | 2.1         | 3.3         | 3.5         | 1.4         | 10.3  |
| SP 2        | Southeast        | 7.3         | 4           | 1.3         | 0           | 12.6  |
| SP 2        | Southeast        | 8           | 4.3         | 1.2         | 0           | 13.5  |
| SP 2        | Southeast        | 4.2         | 5           | 3.8         | 0.6         | 13.6  |
| SP 2        | Southeast        | 3.5         | 4.4         | 4.3         | 1.4         | 13.6  |
| SP 2        | Southeast        | 9.8         | 3.7         | 0.72        | 0           | 14.22 |
| SP 2        | Southeast        | 3.1         | 4.4         | 4.7         | 2.9         | 15.1  |
| SP 2        | Southeast        | 4.7         | 5.1         | 4.5         | 1           | 15.3  |
| SP 2        | Southeast        | 11.2        | 3.8         | 0.65        | 0           | 15.65 |
| SP 2        | Southeast        | 3.8         | 4.9         | 5.7         | 1.8         | 16.2  |
| SP 2        | Southeast        | 9.5         | 5.1         | 1.6         | 0           | 16.2  |
| SP 2        | Southeast        | 5.3         | 4.8         | 4.7         | 1.5         | 16.3  |
| SP 2        | Southeast        | 4.6         | 5.4         | 5           | 1.8         | 16.8  |
| SP 2        | Southeast        | 10.9        | 4.8         | 1.4         | 0           | 17.1  |
| SP 2        | Southeast        | 11.1        | 5           | 1.4         | 0           | 17.5  |
| SP 2        | Southeast        | 5.5         | 6.1         | 4.9         | 1.3         | 17.8  |
| SP 2        | Southeast        | 11.7        | 5.1         | 1.4         | 0           | 18.2  |
| SP 2        | Southeast        | 8.3         | 8.2         | 0           | 1.8         | 18.3  |
| SP 2        | Southeast        | 13.9        | 3.9         | 0.59        | 0           | 18.39 |
| SP 2        | Southeast        | 4.1         | 6.2         | 6.4         | 2.2         | 18.9  |
| SP 2        | Southeast        | 12.4        | 5.3         | 1.4         | 0           | 19.1  |
| SP 2        | Southeast        | 14.7        | 3.7         | 0.73        | 0           | 19.13 |
| SP 2        | Southeast        | 6.08        | 5.08        | 4.57        | 3.46        | 19.19 |
| SP 2        | Southeast        | 4.8         | 6.2         | 6           | 2.2         | 19.2  |
| SP 2        | Southeast        | 13.6        | 4.7         | 1.2         | 0           | 19.5  |

|      |           |      |      |      |      |       |
|------|-----------|------|------|------|------|-------|
| SP 2 | Southeast | 6.3  | 5.9  | 6.1  | 2    | 20.3  |
| SP 2 | Southeast | 6.8  | 6.5  | 5.9  | 1.5  | 20.7  |
| SP 2 | Southeast | 15.4 | 4.7  | 1    | 0    | 21.1  |
| SP 2 | Southeast | 6.7  | 7.6  | 6    | 1.4  | 21.7  |
| SP 2 | Southeast | 7    | 6.1  | 7.4  | 1.3  | 21.8  |
| SP 2 | Southeast | 6.8  | 7.6  | 6.2  | 1.4  | 22    |
| SP 2 | Southeast | 7.36 | 7.2  | 5.13 | 2.46 | 22.15 |
| SP 2 | Southeast | 9.9  | 7.5  | 4.8  | 0.7  | 22.9  |
| SP 2 | Southeast | 15.6 | 5.8  | 1.6  | 0    | 23    |
| SP 2 | Southeast | 16.9 | 5.3  | 0.9  | 0    | 23.1  |
| SP 2 | Southeast | 18.1 | 5    | 1    | 0    | 24.1  |
| SP 2 | Southeast | 5.7  | 7.2  | 8    | 3.5  | 24.4  |
| SP 2 | Southeast | 10.7 | 7.27 | 4.68 | 2.33 | 24.98 |
| SP 2 | Southeast | 19   | 5.2  | 0.94 | 0    | 25.14 |
| SP 2 | Southeast | 12.6 | 7.27 | 3.28 | 1.99 | 25.14 |
| SP 2 | Southeast | 16.2 | 7.5  | 1.8  | 0    | 25.5  |
| SP 2 | Southeast | 11.9 | 8.6  | 5.9  | 0.9  | 27.3  |
| SP 2 | Southeast | 8.7  | 9.2  | 7.8  | 1.7  | 27.4  |
| SP 2 | Southeast | 21.3 | 5.6  | 1.2  | 0    | 28.1  |
| SP 2 | Southeast | 21.8 | 6.1  | 0.6  | 0    | 28.5  |
| SP 2 | Southeast | 13.4 | 9    | 5.4  | 0.7  | 28.5  |
| SP 2 | Southeast | 20.9 | 6.6  | 1.6  | 0    | 29.1  |
| SP 2 | Southeast | 23.5 | 4.9  | 0.82 | 0    | 29.22 |
| SP 2 | Southeast | 22.7 | 6.1  | 0.98 | 0    | 29.78 |
| SP 2 | Southeast | 24.3 | 4.9  | 0.6  | 0    | 29.8  |
| SP 2 | Southeast | 26.1 | 4    | 0    | 0    | 30.1  |
| SP 2 | Southeast | 26.9 | 3.7  | 0    | 0    | 30.6  |
| SP 2 | Southeast | 25.1 | 4.9  | 0.6  | 0    | 30.6  |
| SP 2 | Southeast | 24.1 | 6.1  | 0.97 | 0    | 31.17 |
| SP 2 | Southeast | 22.8 | 6.9  | 1.6  | 0    | 31.3  |
| SP 2 | Southeast | 24.6 | 5.9  | 0.99 | 0    | 31.49 |
| SP 2 | Southeast | 27.1 | 4.4  | 0    | 0    | 31.5  |
| SP 2 | Southeast | 25.3 | 5.8  | 0.96 | 0    | 32.06 |
| SP 2 | Southeast | 23.2 | 7.7  | 1.5  | 0    | 32.4  |
| SP 2 | Southeast | 23.7 | 7.5  | 1.3  | 0    | 32.5  |
| SP 2 | Southeast | 25   | 6.4  | 1.3  | 0    | 32.7  |
| SP 2 | Southeast | 15.8 | 9.4  | 6.5  | 1    | 32.7  |
| SP 2 | Southeast | 18.6 | 10.1 | 4.08 | 0    | 32.78 |
| SP 2 | Southeast | 28.9 | 3.9  | 0    | 0    | 32.8  |
| SP 2 | Southeast | 8.7  | 11.4 | 10   | 2.7  | 32.8  |
| SP 2 | Southeast | 23.9 | 7.6  | 1.3  | 0    | 32.8  |



|      |           |      |      |      |      |       |
|------|-----------|------|------|------|------|-------|
| SP 2 | Southeast | 28.7 | 4.2  | 0    | 0    | 32.9  |
| SP 2 | Southeast | 20.2 | 10.4 | 2.5  | 0    | 33.1  |
| SP 2 | Southeast | 24.7 | 7.6  | 1.4  | 0    | 33.7  |
| SP 2 | Southeast | 29.4 | 4.4  | 0    | 0    | 33.8  |
| SP 2 | Southeast | 29.1 | 4.8  | 0    | 0    | 33.9  |
| SP 2 | Southeast | 25   | 7.3  | 1.6  | 0    | 33.9  |
| SP 2 | Southeast | 28.4 | 5.9  | 0    | 0    | 34.3  |
| SP 2 | Southeast | 27.3 | 6.3  | 1.2  | 0    | 34.8  |
| SP 2 | Southeast | 30.8 | 4.3  | 0    | 0    | 35.1  |
| SP 2 | Southeast | 27.9 | 6.2  | 1.2  | 0    | 35.3  |
| SP 2 | Southeast | 24.8 | 8.7  | 2    | 0    | 35.5  |
| SP 2 | Southeast | 29.9 | 5.2  | 0.7  | 0    | 35.8  |
| SP 2 | Southeast | 29.9 | 5.2  | 0.7  | 0    | 35.8  |
| SP 2 | Southeast | 30   | 5.3  | 0.7  | 0    | 36    |
| SP 2 | Southeast | 13.9 | 11.6 | 8.7  | 1.9  | 36.1  |
| SP 2 | Southeast | 28.6 | 6.2  | 1.3  | 0    | 36.1  |
| SP 2 | Southeast | 28.2 | 7.3  | 0.8  | 0    | 36.3  |
| SP 2 | Southeast | 25.8 | 9.2  | 2.1  | 0    | 37.1  |
| SP 2 | Southeast | 33.6 | 3.8  | 0    | 0    | 37.4  |
| SP 2 | Southeast | 31.8 | 5.7  | 0    | 0    | 37.5  |
| SP 2 | Southeast | 25.3 | 10.2 | 2    | 0    | 37.5  |
| SP 2 | Southeast | 24.8 | 10.3 | 2.6  | 0    | 37.7  |
| SP 2 | Southeast | 33.4 | 4.5  | 0    | 0    | 37.9  |
| SP 2 | Southeast | 33.9 | 4.1  | 0    | 0    | 38    |
| SP 2 | Southeast | 29.2 | 8.4  | 1.5  | 0    | 39.1  |
| SP 2 | Southeast | 34.6 | 4.6  | 0    | 0    | 39.2  |
| SP 2 | Southeast | 23.5 | 10.9 | 3.18 | 1.75 | 39.33 |
| SP 2 | Southeast | 31.7 | 6.5  | 1.2  | 0    | 39.4  |
| SP 2 | Southeast | 34.6 | 4.9  | 0    | 0    | 39.5  |
| SP 2 | Southeast | 35.2 | 4.8  | 0    | 0    | 40    |
| SP 2 | Southeast | 29.2 | 8.9  | 2.1  | 0    | 40.2  |
| SP 2 | Southeast | 19.1 | 12.9 | 6.22 | 2.09 | 40.31 |
| SP 2 | Southeast | 36.5 | 4.1  | 0    | 0    | 40.6  |
| SP 2 | Southeast | 34.9 | 5.6  | 0.8  | 0    | 41.3  |
| SP 2 | Southeast | 34.4 | 6.6  | 0.9  | 0    | 41.9  |
| SP 2 | Southeast | 28.4 | 11.4 | 2.3  | 0    | 42.1  |
| SP 2 | Southeast | 26.4 | 13   | 3.1  | 0    | 42.5  |
| SP 2 | Southeast | 25.8 | 10.9 | 4.05 | 1.84 | 42.59 |
| SP 2 | Southeast | 39   | 4.6  | 0    | 0    | 43.6  |
| SP 2 | Southeast | 37.4 | 5.8  | 0.6  | 0    | 43.8  |
| SP 2 | Southeast | 39.2 | 4.9  | 0    | 0    | 44.1  |

|      |           |      |      |      |     |      |
|------|-----------|------|------|------|-----|------|
| SP 2 | Southeast | 34.8 | 8.4  | 1.1  | 0   | 44.3 |
| SP 2 | Southeast | 30.6 | 11.5 | 2.3  | 0   | 44.4 |
| SP 2 | Southeast | 34.6 | 9.3  | 2.1  | 0   | 46   |
| SP 2 | Southeast | 40.2 | 5.8  | 0.6  | 0   | 46.6 |
| SP 2 | Southeast | 41.6 | 5.2  | 0    | 0   | 46.8 |
| SP 2 | Southeast | 41.4 | 5.5  | 0.6  | 0   | 47.5 |
| SP 2 | Southeast | 42   | 5.5  | 0.6  | 0   | 48.1 |
| SP 2 | Southeast | 16.3 | 17.7 | 11.9 | 2.8 | 48.7 |
| SP 2 | Southeast | 44.1 | 4.9  | 0    | 0   | 49   |
| SP 2 | Southeast | 44   | 4.9  | 0.5  | 0   | 49.4 |
| SP 2 | Southeast | 41   | 7.6  | 0.8  | 0   | 49.4 |
| SP 2 | Southeast | 44   | 5.2  | 0.5  | 0   | 49.7 |
| SP 2 | Southeast | 35   | 12.4 | 2.5  | 0   | 49.9 |
| SP 2 | Southeast | 36.6 | 11.9 | 2.3  | 0   | 50.8 |
| SP 2 | Southeast | 46.2 | 4.9  | 0    | 0   | 51.1 |
| SP 2 | Southeast | 46   | 5.2  | 0    | 0   | 51.2 |
| SP 2 | Southeast | 45.2 | 6.2  | 0.8  | 0   | 52.2 |
| SP 2 | Southeast | 34.3 | 14.4 | 3.6  | 0   | 52.3 |
| SP 2 | Southeast | 29.3 | 14.9 | 8.9  | 1   | 54.1 |
| SP 2 | Southeast | 47.5 | 6.4  | 1    | 0   | 54.9 |
| SP 2 | Southeast | 49.8 | 5.6  | 0    | 0   | 55.4 |
| SP 2 | Southeast | 50.2 | 5.5  | 0    | 0   | 55.7 |
| SP 2 | Southeast | 42.1 | 12.1 | 1.7  | 0   | 55.9 |
| SP 2 | Southeast | 49.8 | 5.8  | 0.6  | 0   | 56.2 |
| SP 2 | Southeast | 40.4 | 12.7 | 3.1  | 0   | 56.2 |
| SP 2 | Southeast | 37.3 | 16.2 | 4.2  | 0   | 57.7 |
| SP 2 | Southeast | 51   | 6.3  | 0.6  | 0   | 57.9 |
| SP 2 | Southeast | 50.9 | 6.3  | 0.7  | 0   | 57.9 |
| SP 2 | Southeast | 29.9 | 16.4 | 10.5 | 1.5 | 58.3 |
| SP 2 | Southeast | 52.2 | 5.6  | 0.5  | 0   | 58.3 |
| SP 2 | Southeast | 46.1 | 10.7 | 2.3  | 0   | 59.1 |
| SP 2 | Southeast | 54   | 5.6  | 0    | 0   | 59.6 |
| SP 2 | Southeast | 46.8 | 11.8 | 1.6  | 0   | 60.2 |
| SP 2 | Southeast | 39.3 | 16.5 | 4.7  | 0   | 60.5 |
| SP 2 | Southeast | 56.2 | 5.6  | 0.7  | 0   | 62.5 |
| SP 2 | Southeast | 48.8 | 13.1 | 2.7  | 0   | 64.6 |
| SP 2 | Southeast | 51.3 | 19   | 5.5  | 0   | 75.8 |
| SP 2 | Southeast | 53.8 | 19.3 | 5.7  | 0   | 78.8 |
| SP 2 | Southeast | 75.8 | 6.1  | 0.5  | 0   | 82.4 |
| SP 2 | Southeast | 65.8 | 14.8 | 1.8  | 0   | 82.4 |
| SP 2 | Southeast | 60   | 20   | 5.1  | 0   | 85.1 |

|             |                  |              |             |      |          |        |
|-------------|------------------|--------------|-------------|------|----------|--------|
| SP 2        | Southeast        | 76           | 17.5        | 3.4  | 0        | 96.9   |
| SP 2        | Southeast        | 80.4         | 15.7        | 2.1  | 0        | 98.2   |
| SP 2        | Southeast        | 72.2         | 21.9        | 5.9  | 0        | 100    |
| SP 2        | Southeast        | 46.3         | 31.2        | 23.6 | 3.8      | 104.9  |
| SP 2        | Southeast        | 76.9         | 21.3        | 7.4  | 0.58     | 106.18 |
| SP 2        | Southeast        | 89           | 16.5        | 2.1  | 0        | 107.6  |
| SP 2        | Southeast        | 136          | 21.4        | 4.1  | 0        | 161.5  |
| <b>SP 2</b> | <b>Southeast</b> | <b>42</b>    | <b>14.5</b> |      | <b>0</b> |        |
| <b>SP 2</b> | <b>Southeast</b> | <b>44.4</b>  | <b>18.8</b> |      | <b>0</b> |        |
| <b>SP 2</b> | <b>Southeast</b> | <b>48.9</b>  | <b>21.3</b> |      | <b>0</b> |        |
| <b>SP 2</b> | <b>Southeast</b> | <b>44.4</b>  | <b>21.4</b> |      | <b>0</b> |        |
| <b>SP 2</b> | <b>Southeast</b> | <b>46</b>    | <b>21.6</b> |      | <b>0</b> |        |
| <b>SP 2</b> | <b>Southeast</b> | <b>59.6</b>  | <b>23.6</b> |      | <b>0</b> |        |
| <b>SP 2</b> | <b>Southeast</b> | <b>59.6</b>  | <b>24.6</b> |      | <b>0</b> |        |
| <b>SP 2</b> | <b>Southeast</b> | <b>94.4</b>  | <b>25.2</b> |      | <b>0</b> |        |
| <b>SP 2</b> | <b>Southeast</b> | <b>114.7</b> | <b>28.6</b> |      | <b>0</b> |        |
| SP 2        | Southwest        | 3.9          | 4.9         | 2.4  | 0        | 11.2   |
| SP 2        | Southwest        | 3.4          | 5.5         | 3    | 0        | 11.9   |
| SP 2        | Southwest        | 0.85         | 1.13        | 3.46 | 8.46     | 13.9   |
| SP 2        | Southwest        | 10           | 4           | 1    | 0        | 15     |
| SP 2        | Southwest        | 5.7          | 6.4         | 3.3  | 0        | 15.4   |
| SP 2        | Southwest        | 4.4          | 6.8         | 4.2  | 0.85     | 16.25  |
| SP 2        | Southwest        | 4.3          | 6.8         | 4.2  | 1.2      | 16.5   |
| SP 2        | Southwest        | 5.6          | 7.3         | 3.6  | 0        | 16.5   |
| SP 2        | Southwest        | 4.9          | 6.9         | 3.8  | 0.98     | 16.58  |
| SP 2        | Southwest        | 5.9          | 7.5         | 3.6  | 0        | 17     |
| SP 2        | Southwest        | 12           | 5           | 1    | 0        | 18     |
| SP 2        | Southwest        | 8            | 7           | 3    | 0        | 18     |
| SP 2        | Southwest        | 6.5          | 7.6         | 4.1  | 0.92     | 19.12  |
| SP 2        | Southwest        | 6            | 7.7         | 4.7  | 0.97     | 19.37  |
| SP 2        | Southwest        | 9            | 8           | 3    | 0        | 20     |
| SP 2        | Southwest        | 9.6          | 6.3         | 3.7  | 0.7      | 20.3   |
| SP 2        | Southwest        | 5.9          | 8.2         | 5.3  | 1.4      | 20.8   |
| SP 2        | Southwest        | 8.3          | 8.6         | 4    | 0        | 20.9   |
| SP 2        | Southwest        | 14           | 6           | 1    | 0        | 21     |
| SP 2        | Southwest        | 8.9          | 8.7         | 5.2  | 0.8      | 23.6   |
| SP 2        | Southwest        | 9.8          | 8.5         | 4.9  | 0.7      | 23.9   |
| SP 2        | Southwest        | 17           | 6           | 1    | 0        | 24     |
| SP 2        | Southwest        | 12           | 9           | 3    | 0        | 24     |
| SP 2        | Southwest        | 12           | 7.8         | 4.1  | 0.6      | 24.5   |
| SP 2        | Southwest        | 8.1          | 9           | 6.4  | 1.1      | 24.6   |

|      |           |      |     |     |      |       |
|------|-----------|------|-----|-----|------|-------|
| SP 2 | Southwest | 15.1 | 7.1 | 2.7 | 0    | 24.9  |
| SP 2 | Southwest | 10.3 | 8.6 | 5.2 | 0.8  | 24.9  |
| SP 2 | Southwest | 17   | 7   | 1   | 0    | 25    |
| SP 2 | Southwest | 12   | 7.9 | 4.5 | 0.7  | 25.1  |
| SP 2 | Southwest | 12   | 7.8 | 4.7 | 0.8  | 25.3  |
| SP 2 | Southwest | 15.3 | 7.6 | 2.8 | 0    | 25.7  |
| SP 2 | Southwest | 9.1  | 9.6 | 6.4 | 1.2  | 26.3  |
| SP 2 | Southwest | 16.1 | 7.2 | 3   | 0    | 26.3  |
| SP 2 | Southwest | 15.6 | 7.8 | 3.1 | 0    | 26.5  |
| SP 2 | Southwest | 20   | 6   | 1   | 0    | 27    |
| SP 2 | Southwest | 17   | 8   | 2   | 0    | 27    |
| SP 2 | Southwest | 13   | 8.9 | 4.5 | 0.6  | 27    |
| SP 2 | Southwest | 17.1 | 7.1 | 2.9 | 0    | 27.1  |
| SP 2 | Southwest | 18   | 7.2 | 2.2 | 0    | 27.4  |
| SP 2 | Southwest | 11.8 | 9.8 | 5.4 | 0.77 | 27.77 |
| SP 2 | Southwest | 23   | 4   | 1   | 0    | 28    |
| SP 2 | Southwest | 20   | 7   | 1   | 0    | 28    |
| SP 2 | Southwest | 17.3 | 8   | 2.9 | 0    | 28.2  |
| SP 2 | Southwest | 11   | 10  | 6.4 | 1.2  | 28.6  |
| SP 2 | Southwest | 21   | 7   | 1   | 0    | 29    |
| SP 2 | Southwest | 21.9 | 5.8 | 1.6 | 0    | 29.3  |
| SP 2 | Southwest | 21   | 8   | 1   | 0    | 30    |
| SP 2 | Southwest | 20.5 | 7.9 | 2.1 | 0    | 30.5  |
| SP 2 | Southwest | 21.6 | 6.8 | 2.2 | 0    | 30.6  |
| SP 2 | Southwest | 13   | 10  | 6.3 | 1.3  | 30.6  |
| SP 2 | Southwest | 12   | 11  | 7   | 1.1  | 31.1  |
| SP 2 | Southwest | 18   | 9.8 | 3.6 | 0    | 31.4  |
| SP 2 | Southwest | 22   | 8   | 2   | 0    | 32    |
| SP 2 | Southwest | 18   | 11  | 3   | 0    | 32    |
| SP 2 | Southwest | 17   | 11  | 4   | 0    | 32    |
| SP 2 | Southwest | 15   | 9.7 | 6.2 | 1.3  | 32.2  |
| SP 2 | Southwest | 23.6 | 7.1 | 1.7 | 0    | 32.4  |
| SP 2 | Southwest | 26   | 6   | 1   | 0    | 33    |
| SP 2 | Southwest | 25   | 7   | 1   | 0    | 33    |
| SP 2 | Southwest | 23.6 | 7.1 | 2.3 | 0    | 33    |
| SP 2 | Southwest | 23   | 8   | 2   | 0    | 33    |
| SP 2 | Southwest | 16   | 10  | 6.5 | 1.4  | 33.9  |
| SP 2 | Southwest | 23   | 9   | 2   | 0    | 34    |
| SP 2 | Southwest | 25.9 | 6.7 | 2   | 0    | 34.6  |
| SP 2 | Southwest | 14   | 11  | 8.2 | 1.7  | 34.9  |
| SP 2 | Southwest | 27   | 7   | 1   | 0    | 35    |

|      |           |      |      |      |      |       |
|------|-----------|------|------|------|------|-------|
| SP 2 | Southwest | 22.4 | 10   | 2.6  | 0    | 35    |
| SP 2 | Southwest | 20.6 | 10.8 | 3.6  | 0    | 35    |
| SP 2 | Southwest | 19   | 12   | 4    | 0    | 35    |
| SP 2 | Southwest | 10.4 | 12.2 | 10.1 | 2.4  | 35.1  |
| SP 2 | Southwest | 22.4 | 10   | 3    | 0    | 35.4  |
| SP 2 | Southwest | 26.3 | 7.3  | 2.1  | 0    | 35.7  |
| SP 2 | Southwest | 25   | 9    | 2    | 0    | 36    |
| SP 2 | Southwest | 24   | 10   | 2    | 0    | 36    |
| SP 2 | Southwest | 24.4 | 9    | 2.7  | 0    | 36.1  |
| SP 2 | Southwest | 16.8 | 11.7 | 6.7  | 0.92 | 36.12 |
| SP 2 | Southwest | 22   | 10   | 4.2  | 0    | 36.2  |
| SP 2 | Southwest | 21   | 11   | 4.2  | 0    | 36.2  |
| SP 2 | Southwest | 8.2  | 11.9 | 12   | 4.2  | 36.3  |
| SP 2 | Southwest | 24.4 | 9.3  | 2.7  | 0    | 36.4  |
| SP 2 | Southwest | 27   | 8    | 2    | 0    | 37    |
| SP 2 | Southwest | 25   | 10   | 2    | 0    | 37    |
| SP 2 | Southwest | 18.5 | 12.1 | 5.9  | 0.73 | 37.23 |
| SP 2 | Southwest | 21   | 11   | 4.7  | 0.6  | 37.3  |
| SP 2 | Southwest | 25.7 | 9.1  | 2.7  | 0    | 37.5  |
| SP 2 | Southwest | 18.5 | 12.1 | 6.3  | 0.81 | 37.71 |
| SP 2 | Southwest | 10.5 | 12.8 | 11.7 | 2.9  | 37.9  |
| SP 2 | Southwest | 27   | 9    | 2    | 0    | 38    |
| SP 2 | Southwest | 27   | 9    | 2    | 0    | 38    |
| SP 2 | Southwest | 27   | 9    | 2    | 0    | 38    |
| SP 2 | Southwest | 26   | 10   | 2    | 0    | 38    |
| SP 2 | Southwest | 23   | 12   | 3    | 0    | 38    |
| SP 2 | Southwest | 15   | 12   | 9.1  | 1.9  | 38    |
| SP 2 | Southwest | 21   | 13   | 4    | 0    | 38    |
| SP 2 | Southwest | 21.6 | 11.7 | 4.8  | 0    | 38.1  |
| SP 2 | Southwest | 28.5 | 7.9  | 1.8  | 0    | 38.2  |
| SP 2 | Southwest | 16   | 12   | 8.7  | 1.7  | 38.4  |
| SP 2 | Southwest | 18   | 12   | 7.4  | 1.3  | 38.7  |
| SP 2 | Southwest | 16   | 12   | 8.9  | 1.9  | 38.8  |
| SP 2 | Southwest | 17   | 13   | 7.6  | 1.2  | 38.8  |
| SP 2 | Southwest | 29.5 | 7.5  | 2    | 0    | 39    |
| SP 2 | Southwest | 17   | 12   | 8.5  | 1.6  | 39.1  |
| SP 2 | Southwest | 18   | 13   | 7    | 1.1  | 39.1  |
| SP 2 | Southwest | 18   | 13   | 7.1  | 1.1  | 39.2  |
| SP 2 | Southwest | 19   | 13.2 | 6.9  | 0.89 | 39.99 |
| SP 2 | Southwest | 28   | 10   | 2    | 0    | 40    |
| SP 2 | Southwest | 28   | 10   | 2    | 0    | 40    |

|      |           |      |      |      |      |       |
|------|-----------|------|------|------|------|-------|
| SP 2 | Southwest | 26.8 | 10.2 | 3    | 0    | 40    |
| SP 2 | Southwest | 28.2 | 10.5 | 1.4  | 0    | 40.1  |
| SP 2 | Southwest | 31.4 | 7.8  | 1.5  | 0    | 40.7  |
| SP 2 | Southwest | 18   | 12   | 9    | 1.7  | 40.7  |
| SP 2 | Southwest | 23.1 | 13.2 | 4.8  | 0    | 41.1  |
| SP 2 | Southwest | 24   | 12.2 | 4.9  | 0    | 41.1  |
| SP 2 | Southwest | 24   | 12   | 4.7  | 0.5  | 41.2  |
| SP 2 | Southwest | 29.2 | 11.1 | 1.5  | 0    | 41.8  |
| SP 2 | Southwest | 19   | 14   | 7.6  | 1.2  | 41.8  |
| SP 2 | Southwest | 20   | 13.5 | 7.4  | 0.93 | 41.83 |
| SP 2 | Southwest | 29   | 11   | 2    | 0    | 42    |
| SP 2 | Southwest | 25.4 | 13.7 | 3.5  | 0    | 42.6  |
| SP 2 | Southwest | 19   | 14   | 8.2  | 1.4  | 42.6  |
| SP 2 | Southwest | 31   | 10   | 2    | 0    | 43    |
| SP 2 | Southwest | 31   | 10   | 2    | 0    | 43    |
| SP 2 | Southwest | 30   | 11   | 2    | 0    | 43    |
| SP 2 | Southwest | 16.1 | 15.6 | 9.9  | 1.4  | 43    |
| SP 2 | Southwest | 25.5 | 13.5 | 4.3  | 0    | 43.3  |
| SP 2 | Southwest | 15.7 | 14.6 | 10.5 | 2.7  | 43.5  |
| SP 2 | Southwest | 23   | 14   | 6    | 0.82 | 43.82 |
| SP 2 | Southwest | 32   | 10   | 2    | 0    | 44    |
| SP 2 | Southwest | 20.4 | 13.6 | 9.1  | 1.4  | 44.5  |
| SP 2 | Southwest | 19   | 15   | 8.9  | 1.7  | 44.6  |
| SP 2 | Southwest | 32   | 11   | 2    | 0    | 45    |
| SP 2 | Southwest | 32   | 11   | 2    | 0    | 45    |
| SP 2 | Southwest | 31   | 11   | 3    | 0    | 45    |
| SP 2 | Southwest | 31   | 11   | 3    | 0    | 45    |
| SP 2 | Southwest | 27.9 | 13.8 | 3.5  | 0    | 45.2  |
| SP 2 | Southwest | 24   | 13.5 | 6.9  | 0.94 | 45.34 |
| SP 2 | Southwest | 8.2  | 13   | 17   | 7.2  | 45.4  |
| SP 2 | Southwest | 27   | 14.1 | 4.5  | 0    | 45.6  |
| SP 2 | Southwest | 34   | 10   | 2    | 0    | 46    |
| SP 2 | Southwest | 31   | 12   | 3    | 0    | 46    |
| SP 2 | Southwest | 30.7 | 12.9 | 2.6  | 0    | 46.2  |
| SP 2 | Southwest | 11.2 | 15.6 | 15   | 4.7  | 46.5  |
| SP 2 | Southwest | 24.6 | 14.3 | 7.1  | 0.92 | 46.92 |
| SP 2 | Southwest | 23   | 16   | 7.3  | 1    | 47.3  |
| SP 2 | Southwest | 18.2 | 15.8 | 10.9 | 2.5  | 47.4  |
| SP 2 | Southwest | 29.3 | 14.9 | 3.7  | 0    | 47.9  |
| SP 2 | Southwest | 35   | 11   | 2    | 0    | 48    |
| SP 2 | Southwest | 34.6 | 11.7 | 1.73 | 0    | 48.03 |

|      |           |      |      |      |     |      |
|------|-----------|------|------|------|-----|------|
| SP 2 | Southwest | 20   | 15   | 11   | 2.1 | 48.1 |
| SP 2 | Southwest | 28.6 | 15.6 | 3.9  | 0   | 48.1 |
| SP 2 | Southwest | 25   | 14   | 8.6  | 1.1 | 48.7 |
| SP 2 | Southwest | 10   | 15   | 17   | 7   | 49   |
| SP 2 | Southwest | 36   | 12   | 2    | 0   | 50   |
| SP 2 | Southwest | 20   | 19   | 10   | 1   | 50   |
| SP 2 | Southwest | 35.8 | 13.2 | 2    | 0   | 51   |
| SP 2 | Southwest | 33   | 13   | 4.9  | 0.5 | 51.4 |
| SP 2 | Southwest | 38   | 12   | 2    | 0   | 52   |
| SP 2 | Southwest | 18   | 18   | 13   | 3   | 52   |
| SP 2 | Southwest | 26.8 | 15.2 | 8.9  | 1.2 | 52.1 |
| SP 2 | Southwest | 26.2 | 15.1 | 9.8  | 1.5 | 52.6 |
| SP 2 | Southwest | 31.1 | 16.5 | 5.3  | 0   | 52.9 |
| SP 2 | Southwest | 21   | 16.9 | 12.7 | 2.5 | 53.1 |
| SP 2 | Southwest | 20.7 | 17.1 | 12.9 | 2.5 | 53.2 |
| SP 2 | Southwest | 30   | 15   | 7.4  | 1.2 | 53.6 |
| SP 2 | Southwest | 14   | 17   | 18   | 5.9 | 54.9 |
| SP 2 | Southwest | 19   | 19   | 14   | 3   | 55   |
| SP 2 | Southwest | 26.2 | 16.7 | 10.5 | 1.7 | 55.1 |
| SP 2 | Southwest | 24   | 20   | 11   | 1   | 56   |
| SP 2 | Southwest | 27.3 | 18.9 | 9    | 0.9 | 56.1 |
| SP 2 | Southwest | 12   | 16   | 20   | 8.3 | 56.3 |
| SP 2 | Southwest | 32   | 16   | 7.4  | 1   | 56.4 |
| SP 2 | Southwest | 22.2 | 18.2 | 13.7 | 2.8 | 56.9 |
| SP 2 | Southwest | 42   | 12   | 3    | 0   | 57   |
| SP 2 | Southwest | 17   | 19   | 17.2 | 4.5 | 57.7 |
| SP 2 | Southwest | 19   | 17   | 17   | 5   | 58   |
| SP 2 | Southwest | 12   | 18   | 20   | 8.1 | 58.1 |
| SP 2 | Southwest | 29.3 | 18   | 10.2 | 1   | 58.5 |
| SP 2 | Southwest | 13   | 18   | 20   | 7.8 | 58.8 |
| SP 2 | Southwest | 43   | 13   | 3    | 0   | 59   |
| SP 2 | Southwest | 25   | 22   | 11   | 1   | 59   |
| SP 2 | Southwest | 30.3 | 18.4 | 9.9  | 1.1 | 59.7 |
| SP 2 | Southwest | 34.3 | 15.5 | 9    | 1   | 59.8 |
| SP 2 | Southwest | 27   | 20   | 11   | 1.9 | 59.9 |
| SP 2 | Southwest | 29.9 | 18.5 | 10.4 | 1.2 | 60   |
| SP 2 | Southwest | 13   | 18   | 21   | 8.6 | 60.6 |
| SP 2 | Southwest | 32.4 | 18.5 | 8.5  | 1.4 | 60.8 |
| SP 2 | Southwest | 25.6 | 19.5 | 13.6 | 2.4 | 61.1 |
| SP 2 | Southwest | 15.1 | 20.5 | 18.9 | 7.1 | 61.6 |
| SP 2 | Southwest | 39.3 | 17.5 | 5.2  | 0   | 62   |

|      |           |      |      |      |     |       |
|------|-----------|------|------|------|-----|-------|
| SP 2 | Southwest | 17.6 | 23   | 17.8 | 3.8 | 62.2  |
| SP 2 | Southwest | 26   | 21   | 13   | 2.5 | 62.5  |
| SP 2 | Southwest | 34.6 | 18.9 | 9.3  | 0.9 | 63.7  |
| SP 2 | Southwest | 34.4 | 19.6 | 9.5  | 1.6 | 65.1  |
| SP 2 | Southwest | 35.4 | 18.8 | 10   | 1.2 | 65.4  |
| SP 2 | Southwest | 49   | 14   | 3    | 0   | 66    |
| SP 2 | Southwest | 36.1 | 18.9 | 10.1 | 1.1 | 66.2  |
| SP 2 | Southwest | 25   | 22.4 | 15.6 | 3.5 | 66.5  |
| SP 2 | Southwest | 28   | 23   | 14   | 2   | 67    |
| SP 2 | Southwest | 34.1 | 20.9 | 10.9 | 1.6 | 67.5  |
| SP 2 | Southwest | 31.8 | 22.3 | 11.4 | 2.1 | 67.6  |
| SP 2 | Southwest | 37.8 | 19   | 9.9  | 1.1 | 67.8  |
| SP 2 | Southwest | 27.6 | 22.4 | 14.7 | 3.1 | 67.8  |
| SP 2 | Southwest | 25.2 | 24.2 | 16.3 | 3.4 | 69.1  |
| SP 2 | Southwest | 37.3 | 20.4 | 10.5 | 1.2 | 69.4  |
| SP 2 | Southwest | 39.3 | 19.4 | 10.2 | 1.2 | 70.1  |
| SP 2 | Southwest | 37   | 20.2 | 11.8 | 1.3 | 70.3  |
| SP 2 | Southwest | 35   | 22.3 | 11.1 | 1.9 | 70.3  |
| SP 2 | Southwest | 23.2 | 24.8 | 17.9 | 4.4 | 70.3  |
| SP 2 | Southwest | 39.6 | 19.6 | 10.2 | 1.1 | 70.5  |
| SP 2 | Southwest | 20.8 | 25.6 | 18.9 | 5.2 | 70.5  |
| SP 2 | Southwest | 28.1 | 22.5 | 16.5 | 3.6 | 70.7  |
| SP 2 | Southwest | 52   | 15   | 4    | 0   | 71    |
| SP 2 | Southwest | 27.6 | 23.6 | 15.8 | 4   | 71    |
| SP 2 | Southwest | 37.2 | 21.2 | 12   | 1.6 | 72    |
| SP 2 | Southwest | 54.3 | 15.8 | 2.53 | 0   | 72.63 |
| SP 2 | Southwest | 33   | 25   | 13   | 2   | 73    |
| SP 2 | Southwest | 37.2 | 21.2 | 13   | 1.7 | 73.1  |
| SP 2 | Southwest | 38.9 | 21   | 11.8 | 1.5 | 73.2  |
| SP 2 | Southwest | 28.2 | 24.4 | 17   | 3.8 | 73.4  |
| SP 2 | Southwest | 44.9 | 19.3 | 8.5  | 1   | 73.7  |
| SP 2 | Southwest | 47.3 | 18.7 | 8    | 0.8 | 74.8  |
| SP 2 | Southwest | 54.2 | 17.2 | 3.7  | 0   | 75.1  |
| SP 2 | Southwest | 31.5 | 23.9 | 16   | 3.7 | 75.1  |
| SP 2 | Southwest | 19.2 | 26.4 | 23.8 | 6.2 | 75.6  |
| SP 2 | Southwest | 37.3 | 23.7 | 12.5 | 2.3 | 75.8  |
| SP 2 | Southwest | 24.1 | 27.2 | 19.9 | 5.3 | 76.5  |
| SP 2 | Southwest | 47.8 | 19   | 9.3  | 1.2 | 77.3  |
| SP 2 | Southwest | 22.5 | 26.4 | 22.9 | 6   | 77.8  |
| SP 2 | Southwest | 23.2 | 26.8 | 22.3 | 5.7 | 78    |
| SP 2 | Southwest | 23   | 27   | 23   | 5   | 78    |



|      |           |      |      |      |     |      |
|------|-----------|------|------|------|-----|------|
| SP 2 | Southwest | 45.3 | 21.4 | 10.8 | 1.1 | 78.6 |
| SP 2 | Southwest | 41.2 | 24.1 | 11.8 | 1.6 | 78.7 |
| SP 2 | Southwest | 50.4 | 19.2 | 8.4  | 0.8 | 78.8 |
| SP 2 | Southwest | 21.2 | 25.2 | 23.8 | 8.8 | 79   |
| SP 2 | Southwest | 29   | 26   | 20   | 4   | 79   |
| SP 2 | Southwest | 27.1 | 29.4 | 19.3 | 4.1 | 79.9 |
| SP 2 | Southwest | 35   | 26   | 16   | 3   | 80   |
| SP 2 | Southwest | 27.8 | 29.3 | 19.1 | 4   | 80.2 |
| SP 2 | Southwest | 48.3 | 21.2 | 10   | 0.9 | 80.4 |
| SP 2 | Southwest | 20.3 | 27.2 | 25.4 | 7.6 | 80.5 |
| SP 2 | Southwest | 37.8 | 25.8 | 14.9 | 2.5 | 81   |
| SP 2 | Southwest | 35   | 27   | 16   | 3   | 81   |
| SP 2 | Southwest | 21.9 | 27.8 | 25.9 | 7.4 | 83   |
| SP 2 | Southwest | 39   | 28   | 14   | 2   | 83   |
| SP 2 | Southwest | 27.3 | 30.4 | 20.8 | 5.1 | 83.6 |
| SP 2 | Southwest | 25.7 | 30.9 | 21.6 | 5.4 | 83.6 |
| SP 2 | Southwest | 51.5 | 21.5 | 10   | 0.8 | 83.8 |
| SP 2 | Southwest | 48.1 | 23.2 | 11.4 | 1.2 | 83.9 |
| SP 2 | Southwest | 63   | 17   | 4    | 0   | 84   |
| SP 2 | Southwest | 25.8 | 29.8 | 22.3 | 6.3 | 84.2 |
| SP 2 | Southwest | 51.2 | 22.4 | 10.5 | 1.2 | 85.3 |
| SP 2 | Southwest | 33   | 28   | 21   | 4   | 86   |
| SP 2 | Southwest | 28   | 29   | 24   | 5   | 86   |
| SP 2 | Southwest | 37   | 29   | 18   | 3   | 87   |
| SP 2 | Southwest | 33   | 29   | 21   | 4   | 87   |
| SP 2 | Southwest | 33   | 29   | 21   | 4   | 87   |
| SP 2 | Southwest | 68   | 17   | 4    | 0   | 89   |
| SP 2 | Southwest | 37   | 30   | 19   | 3   | 89   |
| SP 2 | Southwest | 38.2 | 26.9 | 17.7 | 6.3 | 89.1 |
| SP 2 | Southwest | 48.2 | 26.6 | 12.7 | 1.7 | 89.2 |
| SP 2 | Southwest | 46.3 | 26.8 | 14.7 | 2.2 | 90   |
| SP 2 | Southwest | 38   | 29   | 19   | 4   | 90   |
| SP 2 | Southwest | 38   | 30   | 20   | 3   | 91   |
| SP 2 | Southwest | 68.1 | 19.5 | 4    | 0   | 91.6 |
| SP 2 | Southwest | 55.5 | 24.3 | 10.9 | 1.1 | 91.8 |
| SP 2 | Southwest | 45   | 29   | 16   | 2   | 92   |
| SP 2 | Southwest | 57.5 | 23.4 | 10.3 | 1.1 | 92.3 |
| SP 2 | Southwest | 65.8 | 22.6 | 4.9  | 0   | 93.3 |
| SP 2 | Southwest | 42   | 31   | 19   | 3   | 95   |
| SP 2 | Southwest | 30.4 | 31.2 | 26.9 | 7   | 95.5 |
| SP 2 | Southwest | 69.5 | 21.2 | 4.9  | 0   | 95.6 |

|      |           |      |      |      |     |        |
|------|-----------|------|------|------|-----|--------|
| SP 2 | Southwest | 74.2 | 19.4 | 3.24 | 0   | 96.84  |
| SP 2 | Southwest | 71.3 | 20.9 | 4.8  | 0   | 97     |
| SP 2 | Southwest | 71.7 | 21.3 | 4.9  | 0   | 97.9   |
| SP 2 | Southwest | 73.6 | 20.8 | 3.88 | 0   | 98.28  |
| SP 2 | Southwest | 73.2 | 20.9 | 4.2  | 0   | 98.3   |
| SP 2 | Southwest | 59.6 | 25.4 | 12.5 | 1.1 | 98.6   |
| SP 2 | Southwest | 46.8 | 27.6 | 19.9 | 4.3 | 98.6   |
| SP 2 | Southwest | 74.4 | 20.7 | 3.75 | 0   | 98.85  |
| SP 2 | Southwest | 72.4 | 21.3 | 5.2  | 0   | 98.9   |
| SP 2 | Southwest | 50.5 | 29.5 | 16.8 | 2.8 | 99.6   |
| SP 2 | Southwest | 38.7 | 30   | 25.9 | 7   | 101.6  |
| SP 2 | Southwest | 42.2 | 30.4 | 24.5 | 5.6 | 102.7  |
| SP 2 | Southwest | 50   | 32   | 18   | 3   | 103    |
| SP 2 | Southwest | 48   | 34   | 20   | 3   | 105    |
| SP 2 | Southwest | 83.1 | 21.3 | 3.69 | 0   | 108.09 |
| SP 2 | Southwest | 96   | 13   | 2    | 0   | 111    |
| SP 2 | Southwest | 91.4 | 22   | 4.3  | 0   | 117.7  |

Note: Samples that are bolded did not include measurements for all THM4 species, and were not included in analysis for TTHM, bromine incorporation, or risk. BDCM and DBCM measures from these samples were included in BDCM and DBCM species specific analysis, however.
